# Supplementary material for: Formation of N-heterocyclic diphosphine ligands from Ag(i)-assisted condensation reactions between bdppeda and formaldehyde and their binuclear silver(i) complexes
Source: Royal Society of Chemistry journal article supplement (doi:10.1039/c2dt30860f), 2012-01-01
Supplement: c2dt30860f.pdf [file c2dt30860f.pdf]

## Electronic Supplementary Information

### **Formation of N-heterocyclic diphosphine ligands from Ag(I)-assisted condensation reactions between bdppeda and formaldehyde and their binuclear silver(I) complexes**

Sha Sun,<sup>a</sup> Zhi-Gang Ren,<sup>a</sup> Ju-Hua Yang,<sup>a</sup> Run-Tian He,<sup>a</sup> Fan Wang,<sup>a</sup> Xin-Yi Wu,<sup>a</sup> Wei-Jie Gong,<sup>a</sup> Hong-Xi Li<sup>a</sup> and Jian-Ping Lang<sup>\*a,b</sup>

<sup>a</sup> *Key Laboratory of Organic Synthesis of Jiangsu Province, College of Chemistry, Chemical Engineering and Materials Science, Soochow University, Suzhou 215123, P. R. China. Fax: 86-512-65880089; E-mail: jplang@suda.edu.cn (jplang)*

<sup>b</sup> *State Key Laboratory of Organometallic Chemistry, Shanghai Institute of Organic Chemistry, Chinese Academy of Sciences, Shanghai 200032, P. R. China*

## Contents

**Scheme S1.** Possible mechanism for the formation of  $[\text{Ag}_2(\text{L}_1)_2(\eta,\eta\text{-}\mu\text{-ClO}_4)_2](\text{ClO}_4)_2$  (**1**) from reactions of  $[\text{Ag}(\text{MeCN})_4]\text{ClO}_4$  with bdppeda and HCOOH. ....S3

**Scheme S2.** Possible mechanism for the formation of  $[\text{Ag}_2(\text{L}_2)_2(\mu\text{-Cl})_2]$  (**2**) from reactions of AgCl with bdppeda and HCHO. ....S3

**Figure S1.** Positive-ion ESI MS of complex **1** in DMF. (a) The full data ranging from  $m/z = 100\text{-}1500$ ; (b) The tested (black) and simulated (gray) data at  $m/z = 675.3$  for the parent dication  $[\text{Ag}_2(\text{L}_1)_2(\text{ClO}_4)_2]^{2+}$ ; (c) The tested (black) and simulated (gray) data at  $m/z = 467.2$  for  $[\text{L}_1]^+$  cation. ....S4

**Figure S2.** Positive-ion ESI MS of complex **2** in DMF. (a) The full data ranging from  $m/z = 100\text{-}1500$ ; (b) The tested (black) and simulated (gray) data at  $m/z = 609.1$  for the parent dication  $[\text{Ag}_2(\text{HL}_2)_2\text{Cl}_2]^{2+}$ ; (c) The tested (black) and simulated (gray) data at  $m/z = 1190.8$  for  $[\text{Ag}_2(\text{L}_2)_2\text{Cl}]^+$  cation. (d) The tested (black) and simulated (gray) data at  $m/z = 575.1$  for the  $[\text{Ag}(\text{L}_2)]^+$  cation. ....S5

**Figure S3.** Positive-ion ESI MS of complex **3** in DMF. (a) The full data ranging from  $m/z = 100\text{-}1500$ ; (b) The tested (black) and simulated (gray) data at  $m/z = 611.1$  for the parent dication  $[\text{Ag}_2(\text{L}_1)_2\text{Cl}_2]^{2+}$ ; (c) The tested (black) and simulated (gray) data at  $m/z = 752.9$  for  $[\text{Ag}_2(\text{L}_1)\text{Cl}_2]^+$  cation. (d) The tested (black) and simulated (gray) data at  $m/z = 716.9$  for the  $[\text{Ag}_2(\text{L}_1)\text{Cl}]^+$  cation. (e) tested (black) and simulated (gray) data at  $m/z = 467.2$  for  $[\text{L}_1]^+$  cation. ....S6

**Figure S4.** Experimental (black) and simulated (red) p-XRD patterns for **1** (a); **2**(b); **3**(c). ....S7

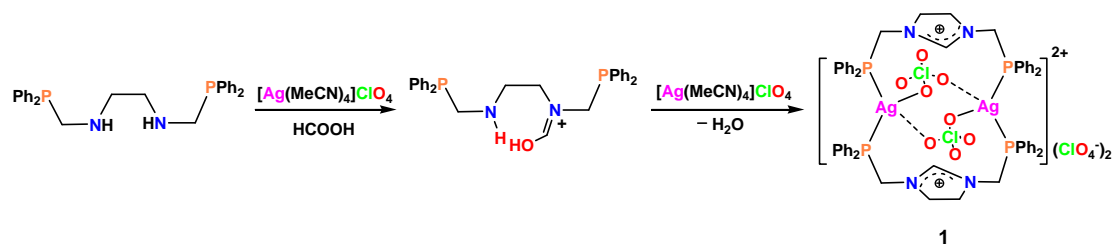

**Scheme S1.** Possible mechanism for the formation of  $[\text{Ag}_2(\text{L}_1)_2(\eta, \eta\text{-}\mu\text{-ClO}_4)_2](\text{ClO}_4)_2$  (**1**) from reactions of  $[\text{Ag}(\text{MeCN})_4]\text{ClO}_4$  with bdppe and  $\text{HCOOH}$ .

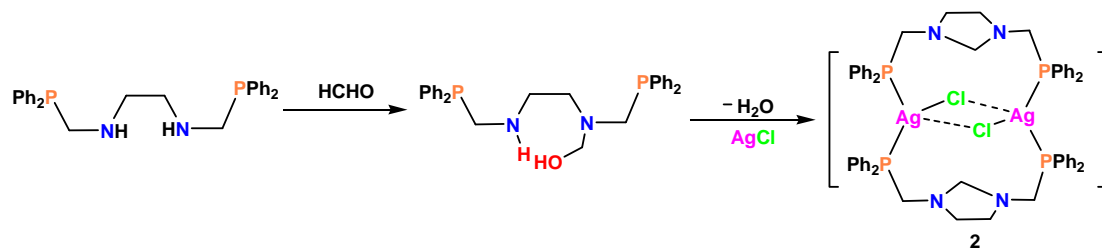

**Scheme S2.** Possible mechanism for the formation of  $[\text{Ag}_2(\text{L}_2)_2(\mu\text{-Cl})_2]$  (**2**) from reactions of  $\text{AgCl}$  with bdppe and  $\text{HCHO}$ .

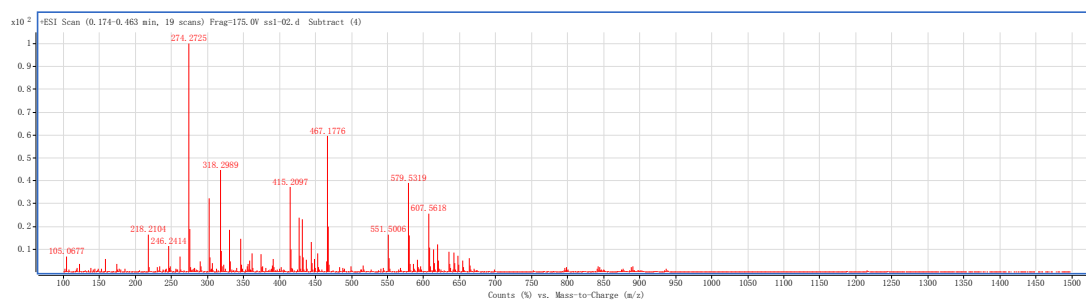

(a)

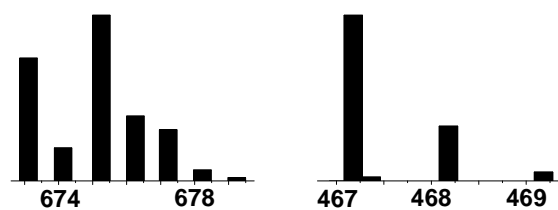

(b)

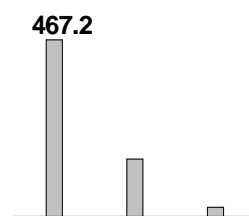

(c)

**Figure S1.** Positive-ion ESI MS of complex **1** in DMF. (a) The full data ranging from  $m/z = 100-1500$ ; (b) tested (black) and simulated (gray) data at  $m/z = 675.3$  for the parent dication  $[\text{Ag}_2(\text{L}_1)_2(\text{ClO}_4)_2]^{2+}$ ; (c) tested (black) and simulated (gray) data at  $m/z = 467.2$  for  $[\text{L}_1]^+$  cation.

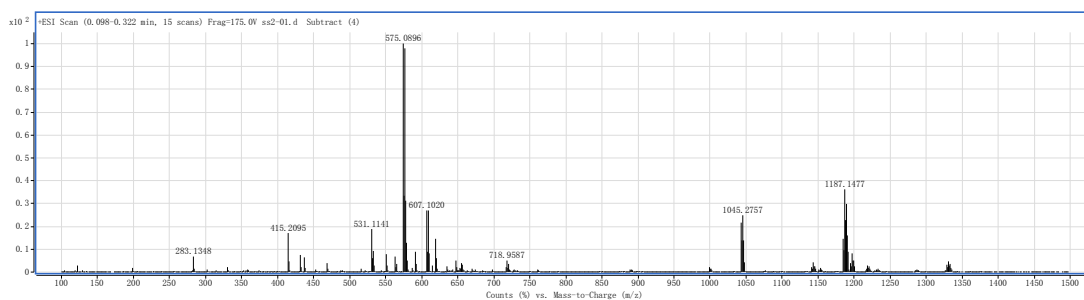

(a)

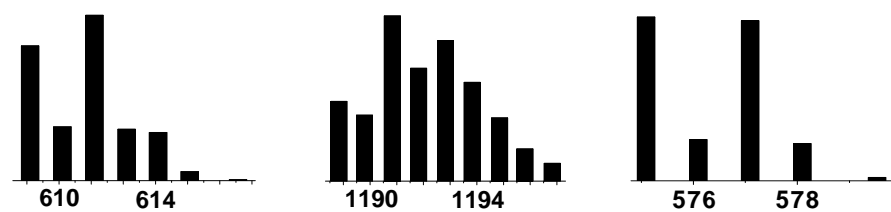

612.1

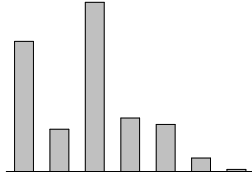

(b)

1190.8

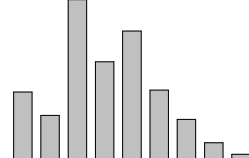

(c)

575.1

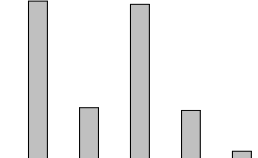

(d)

**Figure S2.** Positive-ion ESI MS of complex **2** in DMF. (a) The full data ranging from  $m/z = 100$ - $1500$ ; (b) The tested (black) and simulated (gray) data at  $m/z = 609.1$  for the parent dication  $[\text{Ag}_2(\text{HL}_2)_2\text{Cl}_2]^{2+}$ ; (c) The tested (black) and simulated (gray) data at  $m/z = 1190.8$  for  $[\text{Ag}_2(\text{L}_2)_2\text{Cl}]^+$  cation. (d) The tested (black) and simulated (gray) data at  $m/z = 575.1$  for the  $[\text{Ag}(\text{L}_2)]^+$  cation.

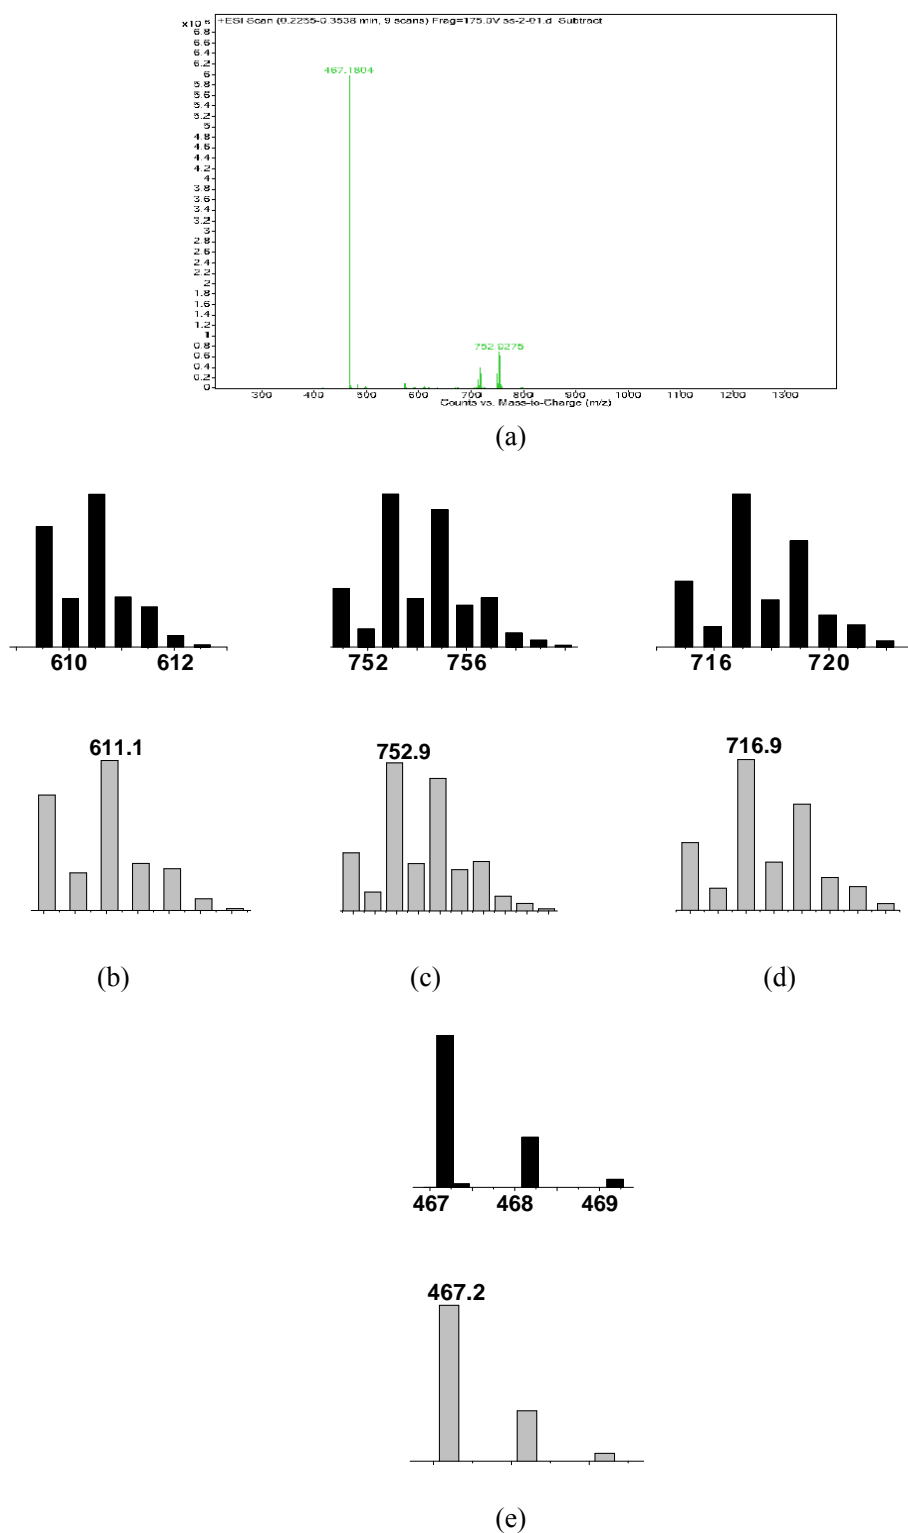

**Figure S3.** Positive-ion ESI MS of complex **3** in DMF. (a) The full data ranging from  $m/z = 100$ - $1500$ ; (b) The tested (black) and simulated (gray) data at  $m/z = 611.1$  for the parent dication  $[\text{Ag}_2(\text{L}_1)_2\text{Cl}_2]^{2+}$ ; (c) The tested (black) and simulated (gray) data at  $m/z = 752.9$  for  $[\text{Ag}_2(\text{L}_1)\text{Cl}_2]^+$  cation. (d) The tested (black) and simulated (gray) data at  $m/z = 716.9$  for the  $[\text{Ag}_2(\text{L}_1)\text{Cl}]^+$  cation. (e) tested (black) and simulated (gray) data at  $m/z = 467.2$  for  $[\text{L}_1]^+$  cation.

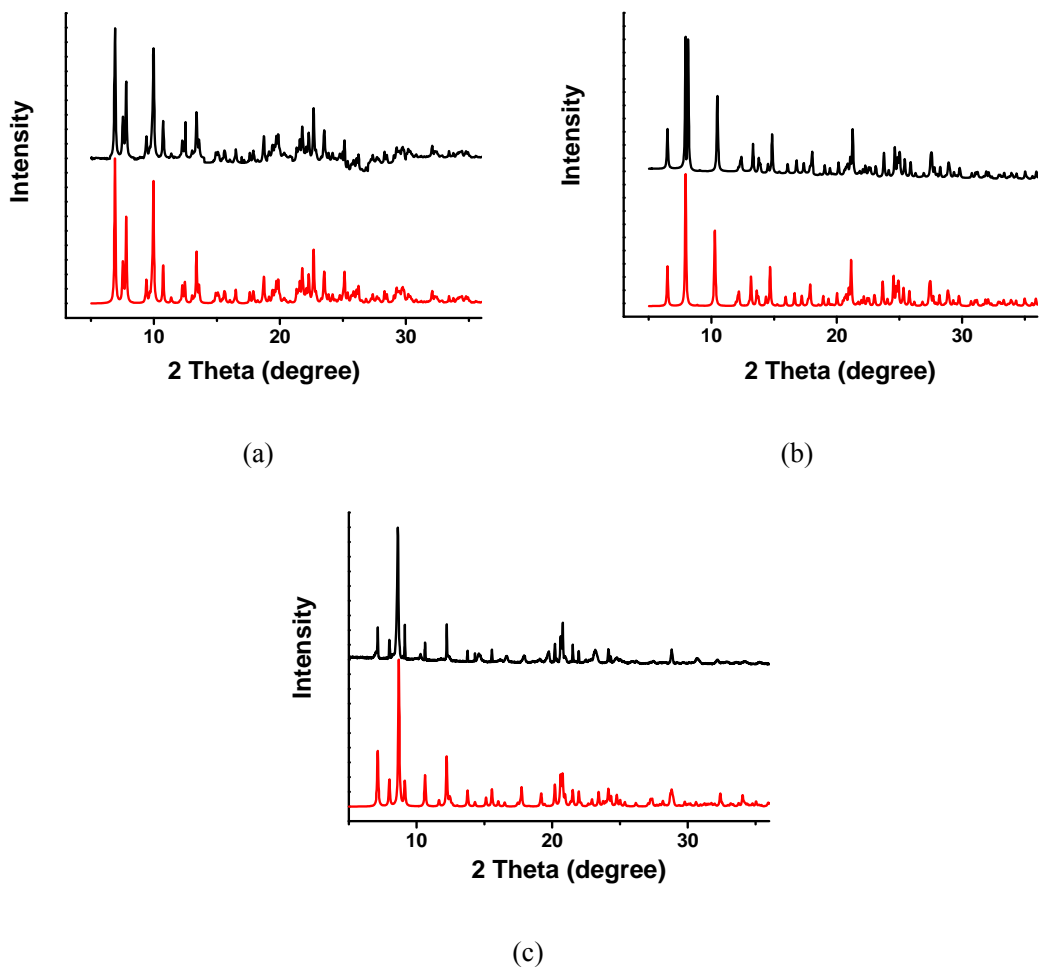

**Figure S4.** Experimental (black) and simulated (red) p-XRD patterns for **1** (a); **2**(b); **3**(c).
